# Supplementary material for: A review of measures aimed at low-performing students in mathematics—What to do?
Source: Frontiers journal article supplement (doi:10.3389/feduc.2025.1705140), 2025-11-17
Supplement: Table_1.docx [file Table_1.docx]

**APPENDIX A**

| **Reference** | **Focus of attention (research on measures applied in primary and lower secondary school mathematics in order to increase low-performing students’ learning?)** | **Setting  (informants, type of school, number of participants)** | **Method, Data source** | **Conclusions and implications for primary and lower secondary school teaching to increase learning for low-performing students in mathematics** | **Implications for research on measures applied to increase learning for low-performing students in mathematics** |
| --- | --- | --- | --- | --- | --- |
| (Burns et al., 2019) | To compare the effectiveness and efficiency of Incremental Rehearsal (IR) and traditional drill (TD) on retention of multiplication facts among students with mathematics difficulties, and to examine the effect that memory has on the results.  IR is a type of flashcard technique that practices new multiplication facts with previously mastered ones at a ratio of one new unknown fact to seven, eight, or nine known ones. The new unknown items are rehearsed incrementally among the known ones. After completing the procedure, the first unknown fact becomes the first known fact, the last known fact is removed, and an additional unknown fact is rehearsed. | *Informants:* 3rd and 4th grade students  *Type of school:* Primary school  *Number of participants: 29*  *Country: USA*  *Low-performing students:* defined by their teachers, based on low mathematical skills as the sole criteria. | Quantitative study  Two interventions, one with emphasis on IR and one with emphasis on TD.  Analysis of number of facts used related to IR and TD, with respect to retention, time and efficiency | Results indicated that IR led to significantly more facts being retained, and was essentially equal to TD for efficiency as measured by number of facts retained per instructional minute.  Retention of multiplication facts seems largely influenced by a student’s memory skills when using less effective instructional techniques such as TD, while approaches like IR are likely effective regardless of memory skills. | IR is more effective than TD in helping students retain multiplication facts.  It may be more effective for teachers to use an activity structure that works despite memory difficulties than to use an activity structure based on measures of memory, for low-performing students. |
| (Casler-Failing, 2018) | Investigation of the effects of incorporating LEGO robotics into a seventh-grade mathematics curriculum. | *Informants:* 7th grade students  *Type of school:* Small, progressive, independent school  *Number of participants: 6*  *Country:* USA  *Low-performing students:*  defined by the teacher as low-performing. | Mixed-method study  An action research case study applying designed lesson based on previous knowledge of the distance, rate, and time formula, combined with a quantitative analysis related to the acquisition of understanding of proportional relationships.  Data included a pre- and post-test, eight designed lessons, and three activities given during intervention. | The quantitative analysis reflects the acquisition of understanding of proportional relationships with the greatest increase being from the low- performing students in the group. Due to the sample size, this can only be brought into attention related to their learning.  The qualitative analysis showed that the students used their understanding of the distance, rate, and time relationship to develop proportional reasoning skills. | The inclusion of robotics was productive for the students learning, especially related to reasoning skills. |
| (de Barros and Ganimian, 2024) | Evaluation of impact of computer-based individualized instruction, in a developing country | *Informants:* 6th -8th grade students in 15 schools  *Type of school:* “Model” public schools.  *Number of participants:* 1528  *Country:* India  *Low-performing students:* performed in the lowest quartile of their grade’s baseline math achievement  distribution | Quantitative study  Quasi-experimental study where the students who were using a computer-adaptive learning software were randomly assigned to either a control group (where they were only able to access the activities for their enrolled grade level), or an intervention group (where they were able to access exercises appropriate for their performance level). | The study shows that after 9 months, computer-based individualized instruction had a null average effect on mathematics achievement. On the other hand, it showed that students in the intervention group with low initial performance scored significantly higher than their control counterparts. | The study implies that that computer-based individualized instruction is most beneficial for low-performing students. |
| (Fernández-Company et al., 2023) | To determine which music, either personal music preferences or music by Mozart that have the most beneficial effect on mathematical performance in a sample of students | *Informants:* Between 12 and 17 years  *Type of school:* Compulsory Secondary Education  *Number of participants:* 185  *Country:* Spain  *Low-performing students:* lower academic grades. | Quantitative study, comparing results on three mathematics tests, where the latter was accompanied by music (The tests were held in term 1, term 2 and term 3, respectively).  The groups were randomly assigned to one of two conditions: listening to their musical preference with headphones or to compositions by Mozart as background music in the classroom, while performing a mathematics test. | There was a decrease in the time used to perform mathematical tasks and the lower-performing students obtained greater benefit from music.  In the group that listened to their musical preference, girls improved the most, and in the group that listened to Mozart’s music, boys improved the most.  It is considered that the optimization of arousal levels has improved attentional focus, which in turn has increased processing speed, enhancing efficiency in selecting information and finding more accurate answers, thus improving mathematical performance. | Listening to music while performing mathematical tasks helped students with poor mathematical performance to a greater extent than other students. |
| (Fuchs et al., 2016) | Wants to focus on student-level characteristics associated with responsiveness, through a fourth-grade fraction intervention. An initial academic deficit severity hypothesis is put forward, in which at-risk students with more severe initial academic deficits are expected to profit less from intervention than students with less severe initial academic deficits. | *Informants:* 4th grade students  *Type of school:* Primary school  *Number of participants:* 236  *Country:* USA  *Low-performing students:* scored below the 35th percentile on a nationally norm-referenced math achievement test. | Quantitative study  Quasi-experimental study, consisting of two intervention groups and one control group. The intervention was identical across the two variances, except for one 7-min component in each 35-min session. | At-risk students who begin intervention with more severe initial math deficits than other students are less likely to complete the intervention having achieved normalized performance, but only when the outcome requires complex integration of the skills addressed during intervention. In the case of fourth-grade fractions, only simple whole-number skill is required to meaningfully participate in and succeed with intervention. | At the level of intervention development, the need to extend the efficacy of the intervention needs to be considered.  At the level of school decision making, it reveals the need for practitioners to consider post-intervention achievement gaps when determining whether students require more sustained or individualized (more intensive) intervention. |
| (Hellstrand et al., 2020) | Impact from a version of the computer-based training program *The Number Race* (NR) for mathematically low-performing children in grade one. (The NR computer game was originally developed for remediation of dyscalculia in children ages 5–8. | *Informants:* 1st grade students  *Type of school:* Primary school  *Number of participants:* 56 low-performing students + 278 average-performing students  *Country:* Finland  *Low-performing students:* perform at or below the twenty-fifth  percentile in validated mathematics tests. | Quantitative study  Quasi-experimental study, intervention group (n=29) and control group (n=27) + control group comprising average-performing children (n = 278) | The investigated the effectiveness of the NR computer game in enhancing low-performing first-grade children’s mathematical performance. There was no statistically significant NR intervention effect found in this study.  As there are several commercial products available, it is important to have a critical approach regarding what products to apply in the teaching, and to have a defined rationale for the use. | As classrooms evolve towards e-classrooms and textbooks are replaced or complemented with e-books, we need more research on the effectiveness of computer assisted instruction. It is primarily important to discuss interventions with positive outcomes and situations in which interventions worked. Therefore, it is also important to learn from studies in which CAI does not appear to be as effective as predicted. |
| (Herbst et al., 2023) | Impact of peer group stability on lower secondary school students’ achievement in mathematics and science | *Informants:* 9th grade students in the period 2010-1015.  *Type of school:* compulsory middle school, also labelled lower secondary school  *Number of participants:* 671286  *Country:* Poland  *Low-performing students:* the lowest decile on a test. | Quantitative study, using data from nationwide, standardized examinations in Poland in the period of 2007-2015 for each of the involved students from their tests in both 6th and 9th grade in the period. | The study show that instability significantly reduces students' expected performance in mathematics and science. The impact of peer group stability on test achievements varies strongly, but very low-performing students and top performing students were most affected | It is not recommendable to push out very low-performing students to an entirely new learning environment. Such a policy proves detrimental (at least in terms of academic achievements) for these struggling children, no matter if they previously attended a competitive or low-profile primary school. |
| (Herrmann et al., 2022) | Investigated individual differences in math achievement among primary school children in Germany: whether there are Matthew effects (=accumulated advantage: individual differences such as math competencies increase over time) or compensatory effects (low achievers catch up with their classmates over time) in math literacy affecting competence development. | *Informants:* 1st-4th grade students  *Type of school:* Primary school  *Number of participants:* 4982 observations corresponding to 2491 children  *Country:* Germany  *Low-performing students:* the lowest 1/3 of performers on a test. | Quantitative study. Selected children were subject to annual tests on educational development, as well as regular math tests. | Both Matthew effects and compensatory effects were found in the study.  The study showed compensatory effects for low and middle achieving students in math literacy, while higher achieving students retained their lead, implying that social inequalities persist to some extent.  Only small long term differences found w.r.t. gender or immigration background. Parental educational level was a decisive factor in initial math achievement, but competence development over time was mixed among the performance groups.  The study cannot decisively identify whether teaching in performance homogenous groups or in groups with mixed performance is more beneficial, but the results indicate that low-achieving students benefit from their higher performing classmates.  “In principle, our findings provide evidence of the educational policy requirement that schools create equal opportunities.” (p. 530) | “Since primary schools seem to reduce initial disadvantages among their students, it might be worth considering a longer period of joint schooling, beyond fourth grade, to further reduce inequalities. These results can also be applied to the international context: Countries with school systems similar to Germany’s could beneﬁt from late performance-based selection of students and mitigate initial achievement gaps through longer joint schooling.” (p. 530) |
| (Hodgen et al., 2023) | Effects of the use of teaching assistants w.r.t. attainment and attitude in numeracy for low-performing primary school students (age 7-10) in England | *Informants:* 3rd-5th grade students (age 7-10)  *Type of school:* Primary school  *Number of participants:* 150  *Country:* England  *Low-performing students:* the lowest  attaining 15–  20% of children for their age who are identified by their school as struggling with numeracy. | Quantitative study; large scale randomized trial of [*Catch Up Numeracy*](https://www.catchup.org/interventions/numeracy.php#:~:text=Catch%20Up%C2%AE%20Numeracy%20is%20a%20structured%20one-to-one%20intervention,than%20double%20the%20progress%20of%20typically%20developing%20learners.) (structured one-to-one intervention aimed at improving numeracy), compared to two controls: One in which TAs provided matched-time numeracy support, and another without support. (1794 low-performing students, 300 teaching assistants) | “[...] our results suggest that providing training and teaching materials for TAs may be less important in improving attainment in numeracy than simply ensuring that TA support is structured and regular.” (p. 231)  Both Catch Up Numeracy and the matched-time support control group had statistically significant positive effect on numeracy attainment.  But no evidence of the impact of Catch Up Numeracy intervention on student attainment compared to the active control.  “The implementation analysis suggested that numeracy support in the matched-time group was better aligned with learning in class and this better alignment may be more effective than tailoring the support to individual needs.” (p. 231)  Weak evidence for positive effect on student attitude. | Ways that TAs can support learning effectively are poorly understood  Weak evidence for potential positive effect on student attitude. “[...] worthy of further examination” (p. 229). |
| (Hotulainen et al., 2016) | A study of results of intervention program (12 lessons) aimed at improving thinking skills of low-achieving first graders. | *Informants:* 1st grade students, along with trained teachers to teach in the intervention program.  *Type of school:* Primary school  *Number of participants:* 149 students  *Country:* Finland  *Low-performing students:* Scoring minus one standard deviation (-1SD) below the total mean score. | Quantitative study. 3 groups: Low-performing students receiving intervention (LowI), and 2 control groups: one group of low-performing students not receiving intervention (LowC), and one group of well performing students not receiving intervention (WellC). Pre-test, post-test and delayed post-test for all groups, testing mathematical skills, thinking skills (reasoning, causality, classification, ...), listening comprehension and reading fluency.  The intervention consists of series of 12 activities over an 8-week period. | Statistically significant improvement of thinking- and mathematical skills for LowI, and delayed post-test show these improvements remain. After intervention, no difference in achievement between LowI and WellC.  “[...] present study’s results strongly support the idea that interventions in thinking skills should target the low-performers in the early school years.” (p. 370) | Some students did not respond to the intervention. Some hypotheses (like dyscalculia) on why are presented, but worthy of further investigation.  Combining intervention with student-specific information and dynamic assessment may increase effectivity |
| (Hulse et al., 2019) | Investigates the effects of use of dynamic game-based math learning technology (using the game *From Here to There! Elementary* (FH2T:E)) on early algebraic understanding. | *Informants:* 2nd grade students, three different schools  *Type of school:* Elementary school  *Number of participants:*  *Country:* USA  *Low-performing students:* No clear definition | Quantitative study. Four sessions with game interaction. Pre- and post-tests assessing student’s math knowledge, comparing progress in understanding between students in gamified and non-gamified conditions. | Found significant improvement among low-performing students.  Students with lower initial test scores who completed more problems in the game demonstrated increased learning gains compared to students who completed less problems. (No increase in post-test scores for initially high achieving students.)  “[...] solving problems within FHT2T:E may be especially beneficial for low-performing students” (p. 436) | “Future studies should also address whether FH2T:E will benefit students with different demographic characteristics” (p. 437)  This approach may be particularly beneficial for students with math anxiety |
| (Koponen et al., 2021) | Children with poor calculation fluency received an intervention consisting of a combination of pure strategy training and self-efficacy (SE) support. The paper studied the effects of including SE support in the intervention. | *Informants:* 2nd-5th grade students  *Type of school:* Primary school  *Number of participants:* 60  *Country:* Finland  *Low-performing students:* Performance at or below the 20% percentile in the calculation fluency tasks. | Quantitative study. Over the course of 12 weeks: Out of the 60 low-performing students, one group (n=32) received strategy training without SE support, while the other group (n=38) received strategy training with SE support.  Various sources of SE were provided: Reachable challenges and exercises adapted to each child’s skills; individual concrete feedback on improvement, like stairs describing development; verbalized feedback by teacher; directing child’s attention to own improvement; discussions on emotions concerning learning; filling in emotional checklist; mistakes accepted and allowed in positive atmosphere, etc. | Explicit SE intervention integrated with strategy training enhanced math SE (that is, their beliefs about their capability to do and learn math) among children with poor calculation fluency and low SE.  “It seems that the students most in need of support – for both poor mathematical skills and low math SE – need explicit SE support to be able to see their progress and change their beliefs about their own math skills.” (p. 12)  The findings support the view that high SE is related to stronger improvement in learning.  “[...] the SE intervention program was integrated with skill training and implemented by education teachers as part of their normal work to support low-performing children; thus, it can be directly applied at schools.” (p. 15) | “Whether children’s beliefs can be strengthened by providing positive efficacy-building experiences in math still needs to be researched.” (p. 2) |
| (Kovalčíková et al., 2021) | Investigated effects, on mathematics achievement and executive functioning (e.g., inhibition, cognitive flexibility, self-regulation, attention control, and planning) among primary school students, of “ExeFun-Mat” intervention (executive functioning stimulation via mathematics), a reciprocal teaching approach with self-questioning, which includes extensive verbalizing, thinking aloud and metacognitive monitoring. | *Informants:* 4th grade studenst with Roma background  *Type of school:* Primary school  *Number of participants:* 122  *Country:* Slovakia  *Low-performing students:* nominated by teachers where the criteria were below average on test during the last three years. | Quantitative study of the form: Pretest – intervention – posttest. One experiment group, two control groups (active and passive). | Executive functions were found to improve over time, both for the control group and the group that received ExeFun-Mat intervention: no significant difference in executive function improvement.  Math performance improved in both groups, no significant difference.  “In conclusion, the current research found that the ExeFun-Mat program that was implemented among grade-four children from Roma backgrounds did not lead to substantial improvements in their executive functions, nor in their math abilities, over and above those brought about by an alternative educational program” (p. 11) |  |
| (Lindström-Sandahl et al., 2024) | Studied effects of early numeracy interventions on second graders with low math performance. | *Informants:* 1st grade students, 21 different schools  *Type of school:* Primary school  *Number of participants: 62*  Initially 735 participants, these were screened and students considered at risk for math difficulty were selected.  *Country:* Sweden  *Low-performing students:* below or at 25 per-centile on two consecutive first-grade mathematics screenings | Quantitative study, pre- and post-test randomized controlled study.    One control group, one group receiving intervention. The intervention group received intensive 9-week numeracy and arithmetic program led by 13 qualified special education teachers. Controls received teaching as usual with potential special education support provided by their schools. | Intervention group demonstrated significantly greater improvements in conceptual knowledge, arithmetic calculations and problem-solving compared to the control group.  The study demonstrates importance of early numeracy interventions. |  |
| (Lopez-Pedersen et al., 2022) | Study how one can mitigate the risk of students with low performance in early numeracy developing learning difficulties in mathematics. | *Informants:* 1st grade students  *Type of school:* Primary school  *Number of participants:*120  Initially 369 participants, these were screened and low performers were selected.  *Country:* Norway  *Low-performing students:* 32% of the children with the lowest score on a screening test. | Quantitative study, pretest-intervention-post-test.  The 120 first-graders were randomly assigned to control group or intervention group.  Intervention group received 14-week intervention targeted early numeracy skills and was delivered in small groups three times a week. | The study indicates that early numeracy skills are malleable in low-performing children, but frequent and long-term interventions are needed for the positive effects to last. | The study found that repetition is needed: “[...] to achieve this, future studies are likely to need a new continuous take on interventions, with only short breaks in between each phase. Ultimately, it seems unlikely that this type of 10- to 20-week intervention will be helpful for most children who struggle.” |
| (Malola, 2020) | Investigated whether arrays can be used to enhance achievement of low-performing 4th graders w.r.t. word problems involving multiplication.  (Example: “Six cupcakes on each row, five rows on a tray. How many cupcakes on a tray.”  Use of arrays means drawing the five rows with 6 dots on each) | *Informants:* 4th grade students  *Type of school:* Primary School  *Number of participants:* 6  *Country:* South Africa  *Low-performing students:* low score on term one mathematical result. Equal representation of high, average and low achievement. | Mixed-method study: Qualitative/quantitative study; design research. Two lessons on multiplication word problems and array representations followed by semi-structured interviews. Pre- and post testing. | The study indicates that arrays have potential of improving learners’ performance in general, and of those low performers in the mathematical concept of word problems involving multiplication. | This was only a small pilot study, future study should include larger samples. |
| (Mononen and Aunio, 2016) | Investigated the impact of counting skills intervention for low-performing first graders. | *Informants:* 1st graders from nine classrooms  *Type of school:* Primary school  *Number of participants:* 151  *Country:* Finland  *Low-performing students:* scoring at or below the 25th percentile on a test designed for the study by the authors. | Quantitative, quasi-experimental study with control group and experiment group.  Groups received 12 interventions over the course of 8 weeks (the ThinkMath program). The intervention focused on verbal counting and counting skills in range 1-20. | Counting skills intervention showed promising effects in improving low-performing children’s mathematical performance as a supplemental instruction. No transfer effect to arithmetical skills found.  Growth in development of mathematical skills slowed down after end of intervention, and the gap between low performers and average performers still existed. | The results “highlight the fact that some low-performing children most likely will need continuous educational support and underline the need for continuous progress monitoring” (p. 6)  Desirable to find intervention with long-lasting effects. |
| (Oudman et al., 2022) | Effect of students self-scoring when it comes to using monitoring (to evaluate your answer) and regulation judgements (if you need more instruction, practice, both or none of them). | *Informants:* 4th grade students (age 9-10)  *Type of school:* Primary school  *Number of participants:* Multiplication: 495  Division: 359  *Country:* Netherland  *Low-performing students:* students who scored below the 25th percentile on the test.  Low-performing and high-performing students were defined separately for both tasks  based on their average performance on the problems across the two days. | Quantitative study.  The students took a test where they solved problems,  The students answered problems and used monitoring and regulation judgements before they self-scored their tasks. After the self-scoring, the students monitored and conducted regulation judgement again. | Having students self-score their math problem solution is an effective way to increase their monitoring accuracy.  Low-performing students need more and different support with self-regulating their learning process regarding practicing problem solving. | Investigate what effective interventions would be to support students to choose for additional practice or instruction, adapted to their monitoring judgements after self-scoring.  Research on (improving) monitoring and regulation accuracy in problem solving tasks.  Investigate whether similar findings would be obtained in schools or countries where self-scoring and taking self-regulatory actions are not yet common. |
| (Pedersen et al., 2023) | Examine the differences between high- and low-performing students’ development of fraction proficiency over a school year and investigate how those differences were related to instruction in fractions versus other mathematical subjects. | *Informants:* 4th grade students in 10 schools  *Type of school:* Primary school  *Number of participants:* 199  *Country:* Denmark  *Low-performing students:* scored below the 25th percentile.  *High-performing students:* above the 75th percentile. | Quantitative study  Quasi-experimental longitudinal study where the teachers got extra courses for teaching fractions. The students conducted five tests throughout the year. | High performing students showed a steady increase in fraction proficiency over almost all instruction periods.  Low-performing students only improved in periods when instruction was specifically focused on fractions.  Low performing students need to develop an overall web of mathematical knowledge through which instruction in other topics also supports their fraction proficiency. | How mathematical domains support high- and low-performing students’ fraction proficiency development differently.  How students transfer knowledge between topics, if this process differs for high- and low-performing students, and how we can support this transfer in mathematics. |
| (Schueler, 2020) | Investigated the academic effects of intensive sessions in small groups during week-long vacations (Vacation Academies). | *Informants:* 6th and 7th grade students  *Type of school: Public*  middle school  *Number of participants:* 1187 students and 70 teachers. Treatment group: 761. Controll group: 426  *Country:* USA  *Low-performing students:* selected by their result on standardized test scores and their teacher’s opinion of whether they would benefit from the program and not disrupt other participants. | Quantitative study  Quasi-experimental study consisting of numerous intervention groups and control groups, student-level administrative data from the schools and an Academy Participant Student Survey.  The treatment groups varied between a single teacher or different specialized teachers during the Vacation Academy. | The math effects of the study appear strongest at the proficiency threshold.  Math-focused instruction seems to have a positive impact on students grades in English.  Students who had the same teacher the whole week had a greater reduction in out-of-school suspensions than in the groups where teachers rotated or had teacher specializations.  Students who were in groups with a teacher rotation for each lesson or teacher specializations had greater achievement scores. | What mechanisms are driving the positive effects of Vacation Academies?  Do Vacation Academies programs hold for students with other criteria than selected in this study?  How do intervention’s impact on student standards to investigate if the math effect is limited to particular skills.  Do small group instruction result in more individualized attention that allows the teacher to identify and remedy reading problems? |
| (Spitzer, 2022) | Investigate effect of study time spent on solving mathematical problem sets on students’ achievement in mathematics, and if study time boosts performance for low-performing students. | *Informants:* 4th to 10th grade students in four consecutive years who use the software Bettermarks.  *Type of school:* Primary school and middle school.  software in Germany (n=4090), Uruguay (n=351) and Netherland (n=1690) in three consecutive years. (Total n=6131)  Age 9-16, 4th to 10th grade.  *Number of participants:* 6131. (4090 from Germany, 351 from Uruguay and 1690 from Netherland)  *Country:* Germany, Uruguay and Netherlands  *Low-performing students:* Low performers are defined as the bottom 20% of performance students in year 1. | Quantitative, longitudinal study.  Collected data from the software used about study time spent on computing mathematical problem sets within the software. | Study time has big impact on performance in mathematics, especially for low performers. Especially week students may boost their performance by increasing study time.  The increase in performance persisted over time and the quality of the study time had an impact on the students’ performance in mathematics. |  |
| (Suseelan et al., 2023) | Explored what are the types of errors made by low-performing students in solving word problems involving  Higher Order Thinking Skills (HOTS). They study also compared the errors made in relation to the different types of schools in Malaysia the students belonged to. | *Informants:* 4th grade students  *Type of school:* Malaysian elementary schools: a National Primary School (NPS), a National-type Chinese Primary School (NTCPS) and a National-Type Tamil Primary School (NTTPS).  *Number of participants:* 18  *Country:* Malaysia  *Low-performing students:* scored below 40% based on the guidelines given by the Malaysian Examination Syndicate. | Mixed-method study  Problem solving screening test followed by four one to one interview sessions. | Transformation errors were the most common error. The study suggests that mathematics educators should plan for an appropriate intervention that would help the students with transformation errors in solving word problems.  Procedural fluency should be a focus in NPS and NTTPS mathematical classrooms.  NTCPS mathematics teachers should collaborate with Mandarin teachers to overcome the reading errors. | Use inferential statistics for making statistical inferences on school-type differences in problem-solving errors made so that more meaningful findings can be obtained. |
| (Xin et al., 2023) | Looked into if model-based problem solving (MBPS) through computer-assisted instruction (CAI) can outperform students who work as usual. | *Informants:* 3rd grade students  *Type of school:* Primary school  *Number of participants:* 17, MBPS-group: 9  As usual-group: 8  *Country:* USA  *Low-performing students:* The school recommended the students who were at the most risk for failure in mathematics. | Quantitative study  Intervention study with one group who got MBPS CAI and one group who proceeded as usual. Collected test data, both pretest and posttest. The MBPS group also did two follow up-tests. | MBPS-CAI can provide teachers with tools to help all students meeting the curriculum standards.  The program enhances performance over the ones in the business-as-usual group. | To validate the results, it will be necessary to do a randomized control trial with different school situations and a larger sample size. |
| (Yeo et al., 2023) | The study focused on the relationship between early mathematics achievement growth trajectories (4th to 6th grade) and its relation to later mathematics achievement.  It also examined the moderating effects of how the students interpret the mathematics teaching style in relations to the mathematical achievement. | *Informants:* 4th-6th and 8th grade students  *Type of school:* Primary school and middle school  *Number of participants:* 2680  *Country:* South Korea  *Low-performing students:* not significant achievement and growth rate. | Quantitative longitudinal study.  Obtained data from the Busan Education Longitudinal Study achievement test from 4th to 8th grade. Students answered a survey about teaching styles. | Direct instruction has a positive effect on average and high performing students, while dialogic instruction has a positive effect on low-performing students and negative effect when it comes to the average students.  For the average groups, mathematical achievement increased when the teacher focused on structured lessons, the efficiency of teaching and fluency in procedures. For the same group, mathematical achievement decreased when the teacher focused on student engagement, discussions, autonomy and inquiry.  Personal factors, like attitude, motivation and previous achievement may play a bigger role in average students’ achievement than teachers instruction.  The catch-up group was not influenced by teaching styles. | The study suggests further studies on the relation between teaching styles and achievement across countries and cultures.  It also mentions that later growth trajectories, in example high school and college will be interesting to look at.  Yeo el. al suggests further research on individual factors that can influence growth trajectories.  Another topic for further research is cognitive domains and teaching styles regarding the characteristics of assessments. |

Burns, M., Aguilar, L., Young, H., Preast, J., Taylor, C., and Walsh, A. (2019). Comparing the Effects of Incremental Rehearsal and Traditional Drill on Retention of Mathematics Facts and Predicting the Effects With Memory. *School Psychology* 34**,** 521–530. doi: 10.1037/spq0000312.

Casler-Failing, S. (2018). The Effects of Integrating LEGO Robotics Into a Mathematics Curriculum to Promote the Development of Proportional Reasoning. *Proceedings of the Interdisciplinary STEM Teaching and Learning Conference* 2. doi: 10.20429/stem.2018.020105.

de Barros, A., and Ganimian, A.J. (2024). Which Students Benefit from Computer-Based Individualized Instruction? Experimental Evidence from Public Schools in India. *Journal of Research on Educational Effectiveness* 17(2)**,** 318–343. doi: 10.1080/19345747.2023.2191604.

Fernández-Company, J.F., Alvarado, J.M., García-Rodríguez, M., and Chamorro-Cantero, I. (2023). Efficacy of music listening on mathematical performance. *Revista Electronica Complutense De Investigacion En Educacion Musical-Reciem* 20**,** 129–154. doi: 10.5209/reciem.80541.

Fuchs, L.S., Sterba, S.K., Fuchs, D., and Malone, A.S. (2016). Does Evidence-Based Fractions Intervention Address the Needs of Very Low-Performing Students? *Journal of Research on Educational Effectiveness* 9(4)**,** 662–677. doi: 10.1080/19345747.2015.1123336.

Hellstrand, H., Korhonen, J., Linnanmäki, K., and Aunio, P. (2020). The Number Race – computer-assisted intervention for mathematically low-performing first graders. *European Journal of Special Needs Education* 35(1)**,** 85–99. doi: 10.1080/13488678.2019.1615792.

Herbst, M., Sobotka, A., and Wójcik, P. (2023). The effect of peer group stability on achievements: Evidence from Poland. *European Journal of Education* 58(1)**,** 166–180. doi: 10.1111/ejed.12545.

Herrmann, S., Meissner, C., Nussbaumer, M., and Ditton, H. (2022). Matthew or compensatory effects? Factors that influence the math literacy of primary-school children in Germany. *British Journal of Educational Psychology* 92(2)**,** 518–534. doi: 10.1111/bjep.12462.

Hodgen, J., Adkins, M., and Ainsworth, S.E. (2023). Can teaching assistants improve attainment and attitudes of low performing pupils in numeracy? Evidence from a large-scale randomised controlled trial. *Cambridge Journal of Education* 53(2)**,** 215–235. doi: 10.1080/0305764X.2022.2093838.

Hotulainen, R., Mononen, R., and Aunio, P. (2016). Thinking skills intervention for low-achieving first graders. *European Journal of Special Needs Education* 31(3)**,** 360–375. doi: 10.1080/08856257.2016.1141541.

Hulse, T., Daigle, M., Manzo, D., Braith, L., Harrison, A., and Ottmar, E. (2019). From here to there! Elementary: a game-based approach to developing number sense and early algebraic understanding. *Etr&D-Educational Technology Research and Development* 67(2)**,** 423–441. doi: 10.1007/s11423-019-09653-8.

Koponen, T., Aro, T., Peura, P., Leskinen, M., Viholainen, H., and Aro, M. (2021). Benefits of Integrating an Explicit Self-Efficacy Intervention With Calculation Strategy Training for Low-Performing Elementary Students. *Frontiers in Psychology* 12. doi: 10.3389/fpsyg.2021.714379.

Kovalčíková, I., Veerbeek, J., Vogelaar, B., Prídavková, A., Ferjenčík, J., Šimčíková, E., et al. (2021). Domain-Specific Stimulation of Executive Functioning in Low-Performing Students with a Roma Background: Cognitive Potential of Mathematics. *Education Sciences* 11(6)**,** 285. doi: 10.3390/educsci11060285.

Lindström-Sandahl, H., Samuelsson, J., Danielsson, H., Samuelsson, S., and Elwér, Å. (2024). A randomized controlled study of a second grade numeracy intervention with Swedish students at-risk of mathematics difficulties. *British Journal of Educational Psychology* 94(4)**,** 1052–1071. doi: 10.1111/bjep.12705.

Lopez-Pedersen, A., Mononen, R., Aunio, P., Scherer, R., and Melby-Lervåg, M. (2022). Improving Numeracy Skills in First Graders with Low Performance in Early Numeracy: A Randomized Controlled Trial. *Remedial and Special Education* 44(2)**,** 126–136. doi: 10.1177/07419325221102537.

Malola, M. (2020). The use of arrays in the learning of multiplication word problems in primary school. *African Educational Research Journal* 8(3)**,** 432–441. doi: 10.30918/AERJ.83.20.033.

Mononen, R., and Aunio, P. (2016). Counting skills intervention for low-performing first graders. *South African Journal of Childhood Education* 6(1)**,** 1–9. doi: 10.4102/sajce.v6i1.407.

Oudman, S., van de Pol, J., and van Gog, T. (2022). Effects of self-scoring their math problem solutions on primary school students’ monitoring and regulation. *Metacognition and Learning* 17(1)**,** 213–239. doi: 10.1007/s11409-021-09281-9.

Pedersen, P.L., Aunio, P., Sunde, P.B., Bjerre, M., and Waagepetersen, R. (2023). Differences in High- and Low-Performing Students' Fraction Learning in the Fourth Grade. *Journal of Experimental Education* 91(4)**,** 636–654. doi: 10.1080/00220973.2022.2107603.

Schueler, B.E. (2020). Making the Most of School Vacation: A Field Experiment of Small Group Math Instruction. *Education Finance and Policy* 15(2)**,** 310–331. doi: 10.1162/edfp_a_00269.

Spitzer, M.W.H. (2022). Just do it! Study time increases mathematical achievement scores for grade 4-10 students in a large longitudinal cross-country study. *European Journal of Psychology of Education* 37(1)**,** 39–53. doi: 10.1007/s10212-021-00546-0.

Suseelan, M., Chew, C.M., and Chin, H. (2023). Higher-order thinking word problem-solving errors made by low-performing pupils: Comparative case study across school types in Malaysia. *Current Psychology* 42(25)**,** 21449–21461. doi: 10.1007/s12144-022-03271-z.

Xin, Y.P., Kim, S.J., Lei, Q.L., Liu, B.Y., Wei, S., Kastberg, S., et al. (2023). The Effect of Model-Based Problem Solving on the Performance of Students Who are Struggling in Mathematics. *Journal of Special Education* 57(3)**,** 181–192. doi: 10.1177/00224669231157032.

Yeo, S., Shim, H., Hwang, S., and Campbell, T.G. (2023). Relations Between Elementary Mathematics Growth Trajectories and Middle School Mathematics Achievement: Moderating Effects of Student Perception of Teaching Styles. *International Journal of Science and Mathematics Education* 21(6)**,** 1889–1912. doi: 10.1007/s10763-022-10332-z.
